# Supplementary material for: Embryonic ethanol exposure alters expression of sox2 and other early transcripts in zebrafish, producing gastrulation defects
Source: PubMed Central journal article supplement (PMC7054311; doi:10.1038/s41598-020-59043-x), 2020-03-03
Supplement: 41598_2020_59043_MOESM2_ESM.pdf [file 41598_2020_59043_MOESM2_ESM.pdf]

**Supplemental Information for:  
Embryonic ethanol exposure alters expression of *sox2* and other early transcripts in zebrafish, producing gastrulation defects**

Swapnalee Sarmah, Rajneesh Srivastava, Jeanette N. McClintick, Sarath C. Janga, Howard J. Edenberg, James A. Marrs

**Supplementary Table 1:** List of differentially expressed probes.

See Excel spreadsheet.

**Supplementary Table 2:** Primer used are quantitative PCR reactions.

| <b>Primer name</b> | <b>Sequences</b>            |
|--------------------|-----------------------------|
| sox2-F             | GGGCACGGGGAACACCAACT        |
| sox2-R             | TGGTCGCTTCTCGCTCTCGG        |
| her7-F             | AGGTCACTCCAGAAAGCAGCACGC    |
| her7-R             | TGGCGGGAGGTTGGTTGAGC        |
| dlc-F              | CGCTCAGATCCACCTCTGTAGACACA  |
| dlc-R              | TGTTCCGGGAATGATGTACACAGGATG |
| rsp15-F            | CAGAGGTGTGGACCTGGACCAGC     |
| rsp15-R            | CGGGCAGGATGACCATGTCTCTC     |
